# Supplementary material for: Effect of intermolecular interaction of the charge-transfer complex between molecular “tweezers” and C60/C70 on second-order nonlinear optical properties
Source: Royal Society of Chemistry journal article supplement (doi:10.1039/d3cp00020f), 2023-01-01
Supplement: d3cp00020f1.pdf [file d3cp00020f1.pdf]

**The effect of intermolecular interaction of the charge transfer  
complex between molecular tweezer and C<sub>60</sub>/C<sub>70</sub> on its second-order  
nonlinear optical properties**

Li Wang<sup>\*1</sup>, Yan-Li Liu<sup>1</sup>, Quan-Jiang Li<sup>1</sup>, Di He<sup>1</sup>, Shen-Hui Chen<sup>1</sup> and Mei-Shan

Wang<sup>\*12</sup>

**The detailed description of the Localized orbital locator (LOL) maps.**

<sup>1</sup>*School of Physics and Optoelectronics Engineering, Ludong University, Yantai, 264025, Shandong, China. E-mail: wangl@ldu.edu.cn (L. Wang);*

<sup>2</sup>*School of Integrated Circuits, Ludong University, Yantai 264025, China. mswang1971@163.com (M. S. Wang).*

<sup>†</sup>*Electronic supplementary information (ESI) available: The components of the total polarizability  $\alpha$  and  $\gamma$  (a.u.) for the studied complexes.*

Localized orbital locator (LOL, Figure 1) maps are often used to explain structures and bonds in a clear and intuitive way. The limit possible values of LOL are: upper limit  $LOL = 1$  for perfect localization, upper limit  $LOL = 0.5$  for gas-like electron pairs, and lower limit  $LOL = 0$  for non-bonding regions. To make the image sharper, we set the color ratio from 0.0 to 0.8. Thus, the pale green LOL basins ( $LOL=0.3\sim 0.6$ ) represent fast-moving electrons (delocalized electrons). The slowest electron region is yellowish red ( $LOL=0.6\sim 0.8$ ), which conforms to the typical two-electron/two-center bonding situation.

**The detailed description of transition density matrix (TDM) maps.**

To describe intramolecular and intermolecular CTs more clearly, transition density matrix (TDM) maps have been performed, where a large value in diagonal term (bright area) corresponds to obvious intramolecular CT, and the bright area in off-diagonal term denotes that intermolecular CT.

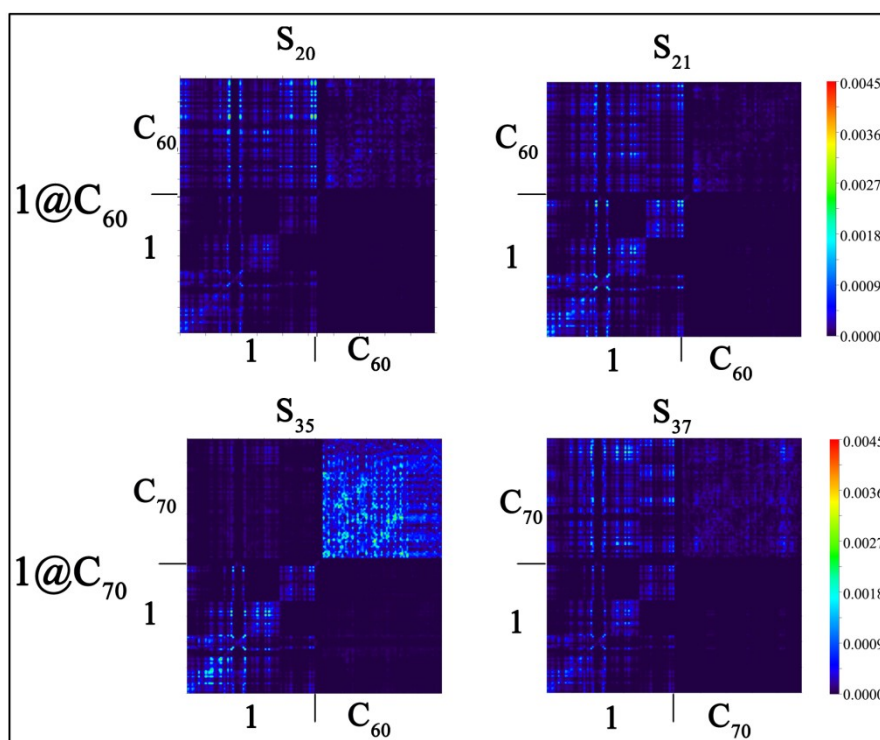

**Figure S1.** The TDM corresponding to the crucial electronic transitions of the complexes ( The hydrogen atoms have been omitted ).

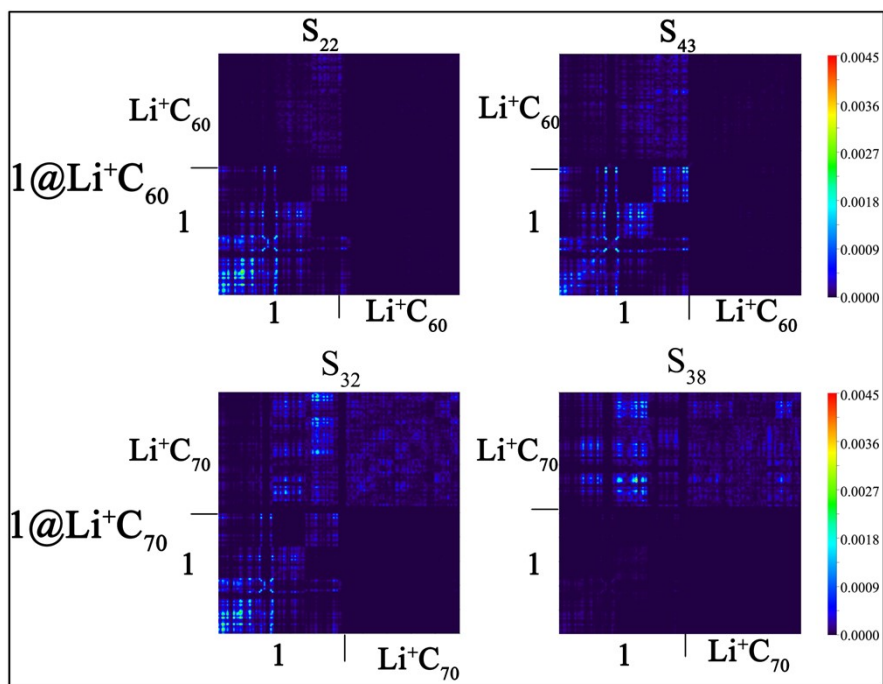

**Figure S2.** The TDM corresponding to the crucial electronic transitions of the complexes ( The hydrogen atoms have been omitted ).

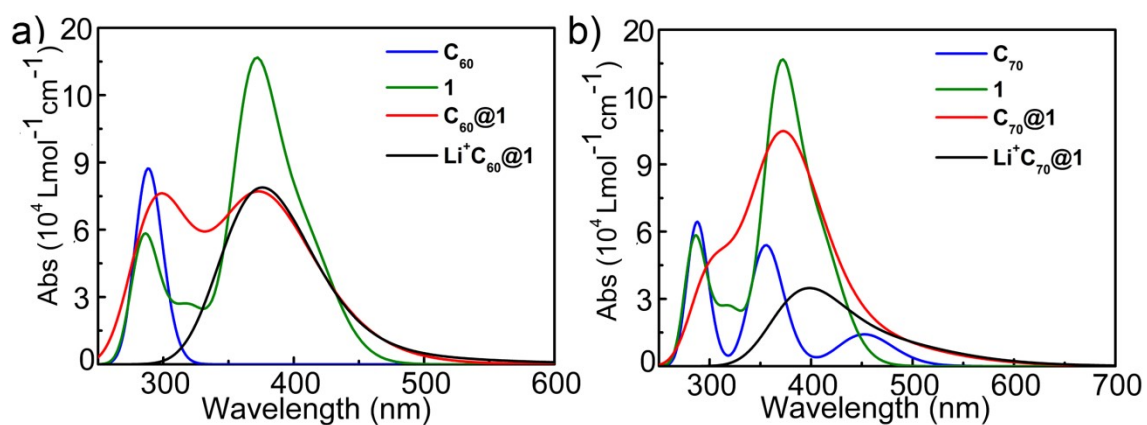

**Figure S3.** The comparison of absorption spectra of  $\text{C}_{60}$ ,  $\text{C}_{70}$ , **1** and these four complexes calculated at the TD-CAM-B3LYP/6-31G (d). The spectral envelope was obtained by convolution of the stick spectra using Gaussian function of 0.6 eV FWHM.

**Table S1.** The components of the total polarizability  $\alpha_{\text{tot}}$  (a.u.) for the studied complexes obtained by BHandHLYP/6-31+G(d) and CAM-B3LYP/6-31+G(d) level.

| Complex                               | Functional | $\alpha_{xx}$ | $\alpha_{yy}$ | $\alpha_{zz}$ | $\alpha_{\text{tot}}$ |
|---------------------------------------|------------|---------------|---------------|---------------|-----------------------|
| <b>C<sub>60</sub>@1</b>               | BHandHLYP  | 1854.9        | 1471.9        | 1141.4        | 1489.4                |
|                                       | CAM-B3LYP  | 1859.3        | 1472.0        | 1145.3        | 1492.2                |
| <b>C<sub>70</sub>@1</b>               | BHandHLYP  | 2015.8        | 1580.1        | 1255.5        | 1617.1                |
|                                       | CAM-B3LYP  | 2020.2        | 1575.8        | 1258.7        | 1618.2                |
| <b>Li<sup>+</sup>C<sub>60</sub>@1</b> | BHandHLYP  | 1909.1        | 1408.6        | 1134.2        | 1483.4                |
|                                       | CAM-B3LYP  | 1908.2        | 1407.8        | 1136.9        | 1484.3                |
| <b>Li<sup>+</sup>C<sub>70</sub>@1</b> | BHandHLYP  | 2002.1        | 1580.1        | 1240.8        | 1607.6                |
|                                       | CAM-B3LYP  | 2003.5        | 1578.3        | 1242.2        | 1608.0                |

**Table S2.** The components of the first hyperpolarizability  $\beta$  (a.u.) and the projection of  $\beta$  on dipole moment ( $\beta_{\text{vec}}$ ) for studied complexes obtained by BhandHLYP/6-31+G(d) and CAM-B3LYP/6-31+G(d) level.

| Complex                               | Functional | $\beta_x$ | $\beta_{\text{tot}}$ | $\beta_{\text{vec}}$ |
|---------------------------------------|------------|-----------|----------------------|----------------------|
| <b>C<sub>60</sub>@1</b>               | BHandHLYP  | 3786.6    | 4078.3               | 3583.3               |
|                                       | CAM-B3LYP  | 3004.8    | 3264.1               | 2760.3               |
| <b>C<sub>70</sub>@1</b>               | BHandHLYP  | 4127.7    | 4325.9               | 4256.0               |
|                                       | CAM-B3LYP  | 3315.1    | 3537.7               | 3462.7               |
| <b>Li<sup>+</sup>C<sub>60</sub>@1</b> | BHandHLYP  | 5758.2    | 5772.3               | 5756.9               |
|                                       | CAM-B3LYP  | 5689.4    | 5121.3               | 5675.6               |
| <b>Li<sup>+</sup>C<sub>70</sub>@1</b> | BHandHLYP  | 4525.6    | 5883.8               | 4721.1               |
|                                       | CAM-B3LYP  | 4368.3    | 5268.5               | 4537.0               |

**Table S3.** The components of second hyperpolarizability  $\gamma$  (a.u.) and for studied complexes obtained by CAM-B3LYP/6-31+G(d) level.

| Complex                               | $\gamma_{xxxx}$ | $\gamma_{yyyy}$ | $\gamma_{zzzz}$ | $\gamma_{xxyy}$ | $\gamma_{xxzz}$ | $\gamma_{yyzz}$ |
|---------------------------------------|-----------------|-----------------|-----------------|-----------------|-----------------|-----------------|
| <b>C<sub>60</sub>@1</b>               | 3438610         | 1319980         | 52996           | 721447          | 66173           | 83810           |
| <b>C<sub>70</sub>@1</b>               | 3246400         | 1017020         | 55118           | 1072680         | 47263           | 62806           |
| <b>Li<sup>+</sup>C<sub>60</sub>@1</b> | 3794760         | 1621490         | 56777           | 1077010         | 52251           | 99226           |
| <b>Li<sup>+</sup>C<sub>70</sub>@1</b> | 3879280         | 1905130         | 47791           | 1102010         | 41224           | 43412           |



## Structures and energies of the complexes

C<sub>60</sub>@1: energy = -5528.04 47359 au

|   |             |             |             |
|---|-------------|-------------|-------------|
| C | 3.65444900  | 3.16071600  | -0.72347400 |
| C | 3.74067800  | 2.17543100  | 0.31236300  |
| C | 4.81849400  | 1.28528500  | 0.33361700  |
| C | 5.85079300  | 1.37170800  | -0.62428200 |
| C | 5.83536300  | 2.41598700  | -1.58271500 |
| C | 4.72884600  | 3.26764800  | -1.63845600 |
| C | 7.01001400  | 0.45148000  | -0.58127300 |
| C | 8.27485800  | 1.01635400  | -0.92999300 |
| C | 8.32190600  | 2.38396200  | -1.58431100 |
| C | 7.06068000  | 2.59279600  | -2.45524000 |
| C | 6.91677100  | -0.90977200 | -0.15360700 |
| C | 8.10116400  | -1.62694600 | 0.20628700  |
| C | 9.32571700  | -1.00681100 | -0.03629400 |
| C | 9.41110900  | 0.26531800  | -0.63826600 |
| C | 5.65103500  | -1.68463000 | -0.17424500 |
| C | 5.51481500  | -2.81357900 | 0.67540400  |
| C | 6.67085200  | -3.16078300 | 1.58840100  |
| C | 7.98962900  | -3.01842100 | 0.79879700  |
| C | 4.63728000  | -1.40282700 | -1.11689100 |
| C | 3.48647200  | -2.19148600 | -1.20455800 |
| C | 3.33164800  | -3.32359500 | -0.34068700 |
| C | 4.36407800  | -3.60128200 | 0.58621100  |
| O | 2.73507700  | 2.18420900  | 1.23471500  |
| C | 2.79389200  | 1.20499800  | 2.27973000  |
| O | 2.47348700  | -1.96931000 | -2.08882200 |
| C | 2.52397700  | -0.76851300 | -2.87091200 |
| C | 2.18935100  | -4.15411200 | -0.44791400 |
| C | 2.52619500  | 4.01364000  | -0.80769000 |
| C | 10.71535600 | -1.49944100 | 0.20804100  |
| N | 11.56672900 | -0.50151300 | -0.30747900 |
| C | 10.85458900 | 0.60252000  | -0.81964700 |
| O | 11.37512200 | 1.60452900  | -1.29942200 |
| O | 11.10440400 | -2.53525300 | 0.73867900  |
| C | 1.52101900  | 4.71374800  | -0.88816700 |
| C | 1.18788300  | -4.84829900 | -0.60107000 |
| C | -1.49639100 | -5.73500700 | 2.80978200  |
| C | -0.49406600 | -5.65684500 | 1.83980800  |
| C | -2.84243300 | -6.16271900 | 2.48414400  |
| C | -0.73764600 | -6.01872200 | 0.45906200  |
| C | -1.96445900 | -6.63117300 | 0.21795300  |

|   |             |             |             |
|---|-------------|-------------|-------------|
| C | -2.98882600 | -6.69665200 | 1.20286400  |
| C | -2.58482900 | -6.65267800 | -1.06019100 |
| C | -4.23890000 | -6.75236300 | 0.53073200  |
| C | -4.09098000 | -5.85576800 | 3.15776800  |
| C | -3.98921800 | -6.72881000 | -0.86790100 |
| C | -5.31999500 | -5.90464000 | 2.49456200  |
| C | -0.03375400 | -5.55449700 | -0.74029100 |
| C | -5.42057000 | -6.26602500 | 1.09324700  |
| C | -0.65747100 | -5.59933100 | -2.01228200 |
| C | -2.00902900 | -6.06557800 | -2.18963800 |
| C | -6.45777500 | -5.93965000 | 0.13291400  |
| C | -6.21252600 | -5.91962200 | -1.24286100 |
| C | -2.94678400 | -5.75271600 | -3.25389000 |
| C | -4.90625200 | -6.22591200 | -1.79260700 |
| C | -4.32827300 | -5.82883400 | -3.06276800 |
| C | -5.93572600 | 6.30662500  | 0.73479300  |
| C | -5.83884300 | 6.35022700  | -0.65882000 |
| C | -4.77622400 | 6.47293200  | 1.59150100  |
| C | -4.57257200 | 6.56750600  | -1.33283400 |
| C | -3.52206300 | 6.92836900  | -0.48794700 |
| C | -3.62021100 | 6.88716100  | 0.92834300  |
| C | -2.15886700 | 6.75133500  | -0.83754100 |
| C | -2.31625700 | 6.68995300  | 1.45533700  |
| C | -4.55990000 | 6.01710300  | 2.95143000  |
| C | -1.41292000 | 6.59904900  | 0.36176800  |
| C | -3.27661700 | 5.82502100  | 3.47152100  |
| C | -4.16720500 | 6.20909300  | -2.67904000 |
| C | -2.08247500 | 6.06681600  | 2.68190200  |
| C | -2.82480700 | 6.03550200  | -3.02598000 |
| C | -1.75572300 | 6.20210300  | -2.05678400 |
| C | -0.75352600 | 5.50578900  | 2.83080800  |
| C | 0.13093500  | 5.40447100  | 1.75293400  |
| C | -0.42841300 | 5.64019200  | -2.05873500 |
| C | -0.22719400 | 5.87536300  | 0.43159100  |
| C | 0.31749900  | 5.46379300  | -0.86742600 |
| C | 13.02196200 | -0.54274000 | -0.18817800 |
| C | 13.48980800 | -0.02500300 | 1.18285000  |
| C | 15.01666800 | -0.11174100 | 1.38333900  |
| C | 15.77992100 | 0.76807000  | 0.37453200  |
| C | 15.37839900 | 0.28690300  | 2.82588700  |
| H | 4.87579200  | 0.50794900  | 1.08911400  |
| H | 4.68959400  | 4.05598200  | -2.39078100 |
| H | 9.24511500  | 2.47966600  | -2.16727000 |
| H | 8.35114700  | 3.16460600  | -0.80398500 |

|   |             |             |             |
|---|-------------|-------------|-------------|
| H | 7.06955500  | 1.85264900  | -3.27491100 |
| H | 7.06581100  | 3.59225600  | -2.91245200 |
| H | 6.70076400  | -2.47604300 | 2.45449700  |
| H | 6.56117300  | -4.18221300 | 1.97893400  |
| H | 8.00089000  | -3.76118900 | -0.01839900 |
| H | 8.86673500  | -3.22120300 | 1.42414800  |
| H | 4.76762400  | -0.56349000 | -1.79150200 |
| H | 4.26011400  | -4.47680400 | 1.22801800  |
| H | 1.91210800  | 1.38502300  | 2.90242800  |
| H | 2.75022700  | 0.18424900  | 1.86647600  |
| H | 3.71463600  | 1.32249700  | 2.87570100  |
| H | 1.57710100  | -0.73894900 | -3.42037500 |
| H | 2.60697200  | 0.11974800  | -2.22402100 |
| H | 3.37233400  | -0.79071000 | -3.57539100 |
| H | -1.28403800 | -5.34629300 | 3.80739800  |
| H | 0.46501000  | -5.20987300 | 2.10379000  |
| H | -4.06645000 | -5.47181000 | 4.17915900  |
| H | -6.20968000 | -5.55583500 | 3.02200500  |
| H | -0.13204800 | -5.12884500 | -2.84384800 |
| H | -7.42842000 | -5.59344400 | 0.49211500  |
| H | -7.00151800 | -5.56026000 | -1.90593400 |
| H | -2.57192700 | -5.33955900 | -4.19178100 |
| H | -4.98285800 | -5.47250200 | -3.86008400 |
| H | -6.89327300 | 6.03013700  | 1.17965400  |
| H | -6.72526600 | 6.10995500  | -1.24861400 |
| H | -5.41595500 | 5.71254400  | 3.55625400  |
| H | -3.18069300 | 5.37831500  | 4.46281100  |
| H | -4.93001500 | 5.95891600  | -3.41843900 |
| H | -2.58896700 | 5.65877200  | -4.02265100 |
| H | -0.47456400 | 5.03590100  | 3.77563900  |
| H | 1.06476200  | 4.85556900  | 1.87931000  |
| H | -0.02286600 | 5.20763000  | -2.97394000 |
| H | 13.33402600 | -1.58700700 | -0.32816400 |
| H | 13.42262500 | 0.07228700  | -1.00287600 |
| H | 13.16469000 | 1.02262600  | 1.29554000  |
| H | 12.98448200 | -0.61681100 | 1.96172500  |
| H | 15.31887800 | -1.16317200 | 1.22889100  |
| H | 16.86351400 | 0.72435500  | 0.56192200  |
| H | 15.60416200 | 0.45251300  | -0.66425900 |
| H | 15.45933600 | 1.81825300  | 0.46881400  |
| H | 16.46188100 | 0.20112000  | 2.99953600  |
| H | 14.85808000 | -0.35075100 | 3.55690800  |
| H | 15.08598300 | 1.33238900  | 3.01668900  |
| C | -6.79530400 | -1.11293000 | -0.32338300 |

|   |             |             |             |
|---|-------------|-------------|-------------|
| C | -6.60556400 | -0.36621300 | -1.55955800 |
| C | -6.50289700 | 1.03485900  | -1.52465500 |
| C | -6.77210800 | 1.01915500  | 0.93926600  |
| C | -6.87804100 | -0.43245100 | 0.90337800  |
| C | -5.72309400 | -1.13944500 | -2.42155200 |
| C | -5.51417500 | 1.71325400  | -2.35059100 |
| C | -6.02526000 | 1.38592400  | 2.13414100  |
| C | -6.19657600 | -0.96222000 | 2.07601600  |
| C | -6.03201900 | -2.34824200 | -0.42195300 |
| C | -5.12010400 | 2.46018400  | 2.09313500  |
| C | -4.92764900 | 3.20339400  | 0.85795800  |
| C | -4.77075700 | -0.48405000 | -3.22034600 |
| C | -4.98724100 | 2.83696400  | -1.58928300 |
| C | -4.66434600 | 0.96701100  | -3.18453600 |
| C | -5.67048000 | 0.16140500  | 2.83815900  |
| C | -5.45823400 | -2.15401900 | 1.97968100  |
| C | -5.37215800 | -2.85622300 | 0.70856000  |
| C | -5.36898000 | -2.36528300 | -1.71854400 |
| C | -4.16565100 | -2.26356100 | 2.64092900  |
| C | -4.02939500 | -3.40043900 | 0.58484400  |
| C | -4.07108100 | -2.88590300 | -1.83350700 |
| C | -4.42343400 | 0.05424600  | 3.47737800  |
| C | -3.25354800 | 1.31752300  | -3.28466800 |
| C | -3.28502200 | -3.03287800 | 1.77686600  |
| C | -3.39039300 | -3.41615900 | -0.66275600 |
| C | -3.08332000 | -2.20939300 | -2.66111700 |
| C | -1.79259000 | -2.31842000 | -1.99758800 |
| C | -1.45403700 | 2.28890400  | -1.88521200 |
| C | -1.98638100 | -3.05899200 | -0.76222500 |
| C | -1.26517100 | -2.70782100 | 0.38619100  |
| C | -0.32232400 | -1.60195500 | 0.34597200  |
| C | -1.92726300 | -2.69392800 | 1.67932000  |
| C | -3.48626100 | 1.16843100  | 3.43734800  |
| C | -0.71234100 | 1.09999100  | -1.98292300 |
| C | -3.65829300 | -1.18094900 | 3.37901900  |
| C | -2.24829200 | -0.83000700 | 3.27755200  |
| C | -1.24042500 | -0.02366300 | -2.74338500 |
| C | -1.54224300 | 2.98883300  | -0.61419300 |
| C | -0.88300800 | 2.48056900  | 0.51345200  |
| C | -0.88511200 | -1.24755600 | -2.03908600 |
| C | -0.13924100 | -0.88050000 | -0.84402600 |
| C | -1.39789200 | -1.57539700 | 2.44340900  |
| C | -0.40820300 | -0.89818700 | 1.61620600  |
| C | -0.02889100 | 0.56899400  | -0.81026100 |

|   |             |             |             |
|---|-------------|-------------|-------------|
| C | -2.14233300 | 0.62170900  | 3.31336200  |
| C | -1.54702500 | 2.49681400  | 1.80663500  |
| C | -0.11783200 | 1.24893600  | 0.41502600  |
| C | -1.19063800 | 1.27577100  | 2.51261100  |
| C | -0.31035600 | 0.50241200  | 1.64837800  |
| C | -2.74547900 | 2.40077900  | -2.54780400 |
| C | -3.62756000 | 3.17138200  | -1.68391400 |
| C | -2.88159000 | 3.54101500  | -0.49154200 |
| C | -3.42539100 | -1.02985200 | -3.34294900 |
| C | -2.48809100 | 0.08335000  | -3.38448100 |
| C | -6.58659200 | 1.73971600  | -0.25287000 |
| C | -5.64944100 | 2.85229200  | -0.29343500 |
| C | -3.52091600 | 3.55367200  | 0.75650100  |
| C | -3.82766600 | 2.34757300  | 2.75427000  |
| C | -2.84174300 | 3.02213800  | 1.92585200  |

C<sub>70</sub>@1: energy = -5909.1740317 au

|   |             |             |             |
|---|-------------|-------------|-------------|
| C | -3.95377000 | 3.08111500  | 0.81412600  |
| C | -3.97046100 | 2.05834300  | -0.18890600 |
| C | -5.01333500 | 1.12879400  | -0.22015800 |
| C | -6.05858300 | 1.16930600  | 0.72891400  |
| C | -6.06836900 | 2.19647300  | 1.70792400  |
| C | -5.01828700 | 3.11800000  | 1.74478200  |
| C | -7.21230500 | 0.24023600  | 0.64060400  |
| C | -8.48072700 | 0.76388900  | 1.04503300  |
| C | -8.54886300 | 2.08936900  | 1.77857400  |
| C | -7.27156700 | 2.29775300  | 2.62045500  |
| C | -7.12261400 | -1.07934100 | 0.09396700  |
| C | -8.30620600 | -1.77268500 | -0.31060700 |
| C | -9.53129100 | -1.19641100 | 0.01807700  |
| C | -9.61484300 | 0.02104500  | 0.72317700  |
| C | -5.85622400 | -1.84726100 | 0.01312900  |
| C | -5.72089500 | -2.86097500 | -0.96999000 |
| C | -6.89542800 | -3.12079900 | -1.88835500 |
| C | -8.19089400 | -3.09315400 | -1.04793100 |
| C | -4.83992600 | -1.67648800 | 0.97739500  |
| C | -3.68209700 | -2.46093000 | 0.95931500  |
| C | -3.51672700 | -3.46071100 | -0.05262800 |
| C | -4.55603900 | -3.63182900 | -0.99787400 |
| O | -2.94025600 | 2.07931000  | -1.08480500 |
| C | -2.84960300 | 0.99632600  | -2.02110500 |
| O | -2.67400900 | -2.35350000 | 1.86960200  |
| C | -2.79097100 | -1.33026800 | 2.86684400  |

|   |              |             |             |
|---|--------------|-------------|-------------|
| C | -2.36653400  | -4.28882400 | -0.08043300 |
| C | -2.92366100  | 4.05340400  | 0.81595900  |
| C | -10.91933700 | -1.69579000 | -0.21872400 |
| N | -11.76841400 | -0.75891800 | 0.40297300  |
| C | -11.05806500 | 0.31498300  | 0.97741900  |
| O | -11.58066600 | 1.26239400  | 1.55568500  |
| O | -11.30780900 | -2.69678900 | -0.81284800 |
| C | -2.01889600  | 4.88254400  | 0.76148100  |
| C | -1.37928000  | -5.01916800 | -0.08198700 |
| C | 1.37537000   | -5.14006200 | -3.56383400 |
| C | 0.34991800   | -5.24097600 | -2.61907200 |
| C | 2.67158900   | -5.75291400 | -3.35138000 |
| C | 0.51856900   | -5.97467700 | -1.38184000 |
| C | 1.68819000   | -6.72440200 | -1.29648800 |
| C | 2.73448100   | -6.61067400 | -2.25193300 |
| C | 2.26568400   | -7.12665700 | -0.06186700 |
| C | 3.95506400   | -6.94241700 | -1.60708000 |
| C | 3.96104600   | -5.40759700 | -3.92099400 |
| C | 3.66525100   | -7.26000800 | -0.25363500 |
| C | 5.16166400   | -5.73493300 | -3.28554200 |
| C | -0.18911000  | -5.79160100 | -0.10973700 |
| C | 5.19082300   | -6.44188400 | -2.01833500 |
| C | 0.39521300   | -6.20710300 | 1.11229900  |
| C | 1.70302500   | -6.80875900 | 1.17551400  |
| C | 6.22362600   | -6.47641400 | -1.00020600 |
| C | 5.93905800   | -6.78987100 | 0.33244300  |
| C | 2.63237600   | -6.85588700 | 2.29122700  |
| C | 4.59339200   | -7.09912600 | 0.77702000  |
| C | 4.00981700   | -6.99622000 | 2.10114300  |
| C | 4.99433100   | 6.91637500  | -1.92140400 |
| C | 5.00238900   | 7.26627200  | -0.56833200 |
| C | 3.75900000   | 6.75883300  | -2.66701000 |
| C | 3.77581100   | 7.49257300  | 0.17371000  |
| C | 2.62290000   | 7.53187800  | -0.61187400 |
| C | 2.61461200   | 7.17943300  | -1.98831200 |
| C | 1.32492500   | 7.29221600  | -0.08936400 |
| C | 1.31073600   | 6.72233000  | -2.31867200 |
| C | 3.49723300   | 5.98955900  | -3.86973500 |
| C | 0.51452700   | 6.78625200  | -1.14194500 |
| C | 2.21475800   | 5.54181900  | -4.19617100 |
| C | 3.52830800   | 7.40834400  | 1.60183700  |
| C | 1.06754400   | 5.81520000  | -3.35025000 |
| C | 2.25205600   | 7.17146100  | 2.11716600  |
| C | 1.09494400   | 6.99316300  | 1.25514000  |

|   |              |             |             |
|---|--------------|-------------|-------------|
| C | -0.17803600  | 5.08077300  | -3.22733000 |
| C | -0.95304800  | 5.12858700  | -2.06640300 |
| C | -0.13691100  | 6.28975400  | 1.52187700  |
| C | -0.56168900  | 5.93208600  | -0.92642100 |
| C | -0.93914200  | 5.76010600  | 0.48424000  |
| C | -13.22613200 | -0.84002600 | 0.36467400  |
| C | -13.79708800 | -0.23031600 | -0.92687200 |
| C | -15.33033300 | -0.35888500 | -1.03520400 |
| C | -16.05494500 | 0.40592700  | 0.08935800  |
| C | -15.80231000 | 0.13876500  | -2.41364600 |
| H | -5.03448700  | 0.36616300  | -0.99136600 |
| H | -5.02582600  | 3.91323500  | 2.49071400  |
| H | -9.45570500  | 2.12163700  | 2.39320300  |
| H | -8.63144700  | 2.90869500  | 1.04275900  |
| H | -7.23256900  | 1.52133500  | 3.40494900  |
| H | -7.29296400  | 3.27476500  | 3.12331500  |
| H | -6.96245400  | -2.34256000 | -2.66907400 |
| H | -6.78189800  | -4.08925300 | -2.39533100 |
| H | -8.16120500  | -3.91893200 | -0.31538100 |
| H | -9.08448500  | -3.24649600 | -1.66388200 |
| H | -4.97543400  | -0.92535400 | 1.74842000  |
| H | -4.44693800  | -4.41619000 | -1.74757500 |
| H | -1.91301100  | 1.16021600  | -2.56401500 |
| H | -2.81349400  | 0.02797600  | -1.49672000 |
| H | -3.70327500  | 1.00531700  | -2.71935100 |
| H | -1.87603500  | -1.39754800 | 3.46316600  |
| H | -2.85832400  | -0.33307400 | 2.40180500  |
| H | -3.67576600  | -1.49960000 | 3.50318700  |
| H | 1.22626600   | -4.48441700 | -4.42347800 |
| H | -0.56293500  | -4.66287200 | -2.76595000 |
| H | 4.00012700   | -4.77986800 | -4.81297700 |
| H | 6.09300800   | -5.35147600 | -3.70611800 |
| H | -0.12397600  | -5.93778500 | 2.03243800  |
| H | 7.23321400   | -6.14626000 | -1.25114500 |
| H | 6.73745600   | -6.69315200 | 1.07034400  |
| H | 2.26312600   | -6.66975600 | 3.30117400  |
| H | 4.66435700   | -6.91459500 | 2.97076500  |
| H | 5.94213300   | 6.65422800  | -2.39531000 |
| H | 5.95587700   | 7.26316900  | -0.03707000 |
| H | 4.33548000   | 5.65829400  | -4.48537400 |
| H | 2.09996800   | 4.87619000  | -5.05366700 |
| H | 4.37274300   | 7.42233400  | 2.29345000  |
| H | 2.14699900   | 7.00790300  | 3.19107400  |
| H | -0.46300200  | 4.37764400  | -4.01216000 |

|   |              |             |             |
|---|--------------|-------------|-------------|
| H | -1.80804200  | 4.45930800  | -1.96848800 |
| H | -0.40234100  | 6.03016700  | 2.54729600  |
| H | -13.49654500 | -1.90275500 | 0.43495300  |
| H | -13.59459300 | -0.30801200 | 1.25006600  |
| H | -13.51304600 | 0.83422500  | -0.97278700 |
| H | -13.32600300 | -0.73845800 | -1.78252100 |
| H | -15.58621500 | -1.43036400 | -0.94864300 |
| H | -17.14634300 | 0.32775100  | -0.02858800 |
| H | -15.79522000 | 0.01932900  | 1.08559300  |
| H | -15.78440100 | 1.47380600  | 0.05845000  |
| H | -16.89119500 | 0.02154100  | -2.52396200 |
| H | -15.30965700 | -0.41598800 | -3.22673400 |
| H | -15.56229000 | 1.20749500  | -2.53570400 |
| C | 6.95458800   | -0.18022700 | 1.57553100  |
| C | 6.95223700   | 0.86495600  | 0.60262400  |
| C | 6.76138600   | 0.50716900  | -0.81471600 |
| C | 6.58674100   | -0.86926900 | -1.15319400 |
| C | 6.68108200   | -1.91516100 | -0.15329100 |
| C | 6.86454900   | -1.57558200 | 1.19216400  |
| C | 5.60768500   | -1.27940300 | -2.12957700 |
| C | 5.09984800   | -2.57800900 | -1.73362600 |
| C | 3.74731200   | -2.88002300 | -1.92057500 |
| C | 2.86477900   | -1.89710800 | -2.51476200 |
| C | 3.35596100   | -0.64512800 | -2.99542400 |
| C | 1.58725300   | -1.99288500 | -1.85221600 |
| C | 0.76569700   | -0.84270500 | -1.65575300 |
| C | 0.07547600   | -0.68263200 | -0.36166800 |
| C | 0.26479100   | -1.68402300 | 0.63617000  |
| C | 1.03251500   | -2.88131400 | 0.37293600  |
| C | 1.68446300   | -3.03479600 | -0.85203800 |
| C | 0.45438800   | -1.33381300 | 2.02005800  |
| C | 1.33320100   | -2.31996500 | 2.61453400  |
| C | 2.27887300   | -1.92438400 | 3.56700700  |
| C | 2.37242900   | -0.52869600 | 3.94844700  |
| C | 1.45740000   | 0.44692900  | 3.44736800  |
| C | 0.46002900   | 0.02810100  | 2.44619700  |
| C | 4.28095800   | 1.08184000  | 3.84161000  |
| C | 5.58693600   | 1.18084000  | 3.16516400  |
| C | 6.28129000   | -0.02403900 | 2.84122900  |
| C | 5.77552100   | -1.32322800 | 3.24070200  |
| C | 4.53443200   | -1.41698800 | 3.88169100  |
| C | 3.76628200   | -0.21527700 | 4.14346100  |
| C | 4.78108500   | -0.32391100 | -2.79531900 |
| C | 5.15973600   | 1.04632000  | -2.65756000 |



|   |             |             |             |
|---|-------------|-------------|-------------|
| C | 2.41496700  | 0.42755700  | -3.04366500 |
| C | 4.19421900  | 2.11869700  | -2.79920900 |
| C | 2.84057000  | 1.81219000  | -2.98756600 |
| C | 1.13621600  | 0.32955700  | -2.38182600 |
| C | 0.77244100  | 1.65454500  | -1.91795000 |
| C | 0.12409300  | 1.80406800  | -0.68682500 |
| C | -0.19073000 | 0.63734900  | 0.11151900  |
| C | -0.00710600 | 0.98884500  | 1.49879500  |
| C | 0.42015600  | 2.37299400  | 1.55388800  |
| C | 1.36801700  | 2.77228000  | 2.50328600  |
| C | 1.92112600  | 1.79682800  | 3.42249500  |
| C | 3.31591000  | 2.11025400  | 3.61746800  |
| C | 3.62540100  | 3.27929900  | 2.81836600  |
| C | 4.86687600  | 3.37536600  | 2.17718700  |
| C | 5.83162200  | 2.30162000  | 2.31489800  |
| C | 6.50604600  | 2.14582400  | 1.04958200  |
| C | 5.95804600  | 3.12331300  | 0.12930800  |
| C | 5.77557600  | 2.78251200  | -1.21658900 |
| C | 6.13779500  | 1.45684600  | -1.67951500 |
| C | 1.82160300  | 2.58005700  | -2.30010400 |
| C | 0.49294100  | 2.88508900  | 0.20071900  |
| C | 2.41930900  | 3.70098700  | 2.13263300  |
| C | 4.94773900  | 3.89805100  | 0.82634700  |
| C | 4.57645500  | 3.20409000  | -1.91603000 |
| C | 5.77095700  | -2.98585200 | -0.51538700 |
| C | 3.01657800  | -3.60315100 | -0.89984400 |
| C | 1.68618900  | -3.29287400 | 1.59829500  |
| C | 3.61670100  | -2.48685700 | 3.53542700  |
| C | 6.14437600  | -2.29469300 | 2.22696800  |
| C | 3.65895100  | -3.99555000 | 0.28459500  |
| C | 2.98103500  | -3.83281600 | 1.55919900  |
| C | 3.96507600  | -3.42284000 | 2.54598000  |
| C | 5.25424100  | -3.32733600 | 1.87957900  |
| C | 5.06243400  | -3.67718800 | 0.48193600  |
| C | 3.77898000  | 4.29511400  | 0.15575600  |
| C | 2.49349900  | 4.19256000  | 0.82018900  |
| C | 1.51176400  | 3.77707800  | -0.16325000 |
| C | 2.19007100  | 3.62179900  | -1.43524500 |
| C | 3.59078600  | 3.94174200  | -1.23976100 |

Li<sup>+</sup>C<sub>60</sub>@1: energy = -5535.3799072 au

|   |             |             |             |
|---|-------------|-------------|-------------|
| C | 3.66517000  | 3.16073200  | -0.72331900 |
| C | 3.75142200  | 2.17544600  | 0.31251600  |
| C | 4.82923100  | 1.28529100  | 0.33373800  |
| C | 5.86150200  | 1.37170500  | -0.62419300 |
| C | 5.84605200  | 2.41598400  | -1.58262500 |
| C | 4.73954100  | 3.26765500  | -1.63833400 |
| C | 7.02071600  | 0.45146800  | -0.58121800 |
| C | 8.28555500  | 1.01633000  | -0.92997600 |
| C | 8.33259400  | 2.38393700  | -1.58429600 |
| C | 7.07134500  | 2.59278200  | -2.45518700 |
| C | 6.92747400  | -0.90978400 | -0.15354800 |
| C | 8.11187200  | -1.62696800 | 0.20631100  |
| C | 9.33642300  | -1.00684400 | -0.03630800 |
| C | 9.42180800  | 0.26528400  | -0.63828300 |
| C | 5.66173100  | -1.68463100 | -0.17414800 |
| C | 5.52552700  | -2.81357800 | 0.67550500  |
| C | 6.68158800  | -3.16079200 | 1.58846800  |
| C | 8.00034300  | -3.01844200 | 0.79882400  |
| C | 4.64795000  | -1.40282000 | -1.11676300 |
| C | 3.49713300  | -2.19146900 | -1.20439600 |
| C | 3.34232500  | -3.32357600 | -0.34052000 |
| C | 4.37478000  | -3.60127100 | 0.58634700  |
| O | 2.74584900  | 2.18423300  | 1.23489800  |
| C | 2.80468600  | 1.20502200  | 2.27991200  |
| O | 2.48412300  | -1.96928500 | -2.08862900 |
| C | 2.53460000  | -0.76848800 | -2.87072200 |
| C | 2.20001800  | -4.15408300 | -0.44771200 |
| C | 2.53692100  | 4.01366600  | -0.80750100 |
| C | 10.72606500 | -1.49948500 | 0.20798600  |
| N | 11.57743100 | -0.50156500 | -0.30756000 |
| C | 10.86528500 | 0.60247400  | -0.81970700 |
| O | 11.38581300 | 1.60447900  | -1.29949800 |
| O | 11.11512000 | -2.53530000 | 0.73861200  |
| C | 1.53174900  | 4.71378200  | -0.88794900 |
| C | 1.19853900  | -4.84826100 | -0.60083800 |
| C | -1.48564000 | -5.73494500 | 2.81009500  |
| C | -0.48334400 | -5.65679300 | 1.84009100  |
| C | -2.83169600 | -6.16264600 | 2.48449800  |
| C | -0.72696800 | -6.01866800 | 0.45935200  |
| C | -1.95379400 | -6.63110800 | 0.21828100  |
| C | -2.97813200 | -6.69657800 | 1.20322200  |
| C | -2.57420200 | -6.65260800 | -1.05984500 |

|   |             |             |             |
|---|-------------|-------------|-------------|
| C | -4.22822700 | -6.75227900 | 0.53112800  |
| C | -4.08022000 | -5.85568300 | 3.15815900  |
| C | -3.97858600 | -6.72872800 | -0.86751300 |
| C | -5.30925500 | -5.90454600 | 2.49499000  |
| C | -0.02310800 | -5.55444900 | -0.74002200 |
| C | -5.40987500 | -6.26593000 | 1.09367800  |
| C | -0.64686400 | -5.59927800 | -2.01199400 |
| C | -1.99843100 | -6.06551400 | -2.18930900 |
| C | -6.44710700 | -5.93954700 | 0.13337600  |
| C | -6.20189900 | -5.91952100 | -1.24240700 |
| C | -2.93621600 | -5.75264400 | -3.25353400 |
| C | -4.89564400 | -6.22582300 | -1.79219200 |
| C | -4.31770000 | -5.82875000 | -3.06237100 |
| C | -5.92493300 | 6.30672500  | 0.73523500  |
| C | -5.82809300 | 6.35032500  | -0.65838100 |
| C | -4.76540500 | 6.47302200  | 1.59190700  |
| C | -4.56183900 | 6.56759300  | -1.33243300 |
| C | -3.51130200 | 6.92844700  | -0.48757700 |
| C | -3.60940800 | 6.88724100  | 0.92871500  |
| C | -2.14811800 | 6.75140100  | -0.83721200 |
| C | -2.30544000 | 6.69002100  | 1.45567100  |
| C | -4.54904300 | 6.01719100  | 2.95183000  |
| C | -1.40213700 | 6.59910900  | 0.36207400  |
| C | -3.26574700 | 5.82509800  | 3.47188400  |
| C | -4.15651600 | 6.20917600  | -2.67865100 |
| C | -2.07162700 | 6.06688300  | 2.68222800  |
| C | -2.81413000 | 6.03557300  | -3.02563100 |
| C | -1.74501500 | 6.20216600  | -2.05646800 |
| C | -0.74267700 | 5.50584400  | 2.83109500  |
| C | 0.14175000  | 5.40451800  | 1.75319400  |
| C | -0.41771000 | 5.64024200  | -2.05845900 |
| C | -0.21641400 | 5.87541300  | 0.43186100  |
| C | 0.32823600  | 5.46383800  | -0.86717100 |
| C | 13.03266700 | -0.54280500 | -0.18830200 |
| C | 13.50055900 | -0.02507100 | 1.18271100  |
| C | 15.02742400 | -0.11182200 | 1.38315500  |
| C | 15.79065500 | 0.76798200  | 0.37432400  |
| C | 15.38920200 | 0.28681900  | 2.82569100  |
| H | 4.88654500  | 0.50795600  | 1.08923300  |
| H | 4.70027300  | 4.05598900  | -2.39065700 |
| H | 9.25578700  | 2.47963400  | -2.16728300 |
| H | 8.36186600  | 3.16458100  | -0.80397100 |
| H | 7.08018800  | 1.85263500  | -3.27485800 |
| H | 7.07647000  | 3.59224200  | -2.91240000 |

|   |             |             |             |
|---|-------------|-------------|-------------|
| H | 6.71153200  | -2.47605200 | 2.45456200  |
| H | 6.57191200  | -4.18222100 | 1.97900500  |
| H | 8.01157300  | -3.76121000 | -0.01837200 |
| H | 8.87746500  | -3.22123100 | 1.42414900  |
| H | 4.77828100  | -0.56348400 | -1.79137900 |
| H | 4.27082800  | -4.47679300 | 1.22815800  |
| H | 1.92292200  | 1.38505600  | 2.90263600  |
| H | 2.76100000  | 0.18427400  | 1.86666000  |
| H | 3.72545000  | 1.32251300  | 2.87585500  |
| H | 1.58770800  | -0.73891600 | -3.42015600 |
| H | 2.61762200  | 0.11977300  | -2.22383300 |
| H | 3.38293500  | -0.79069200 | -3.57522600 |
| H | -1.27325400 | -5.34623300 | 3.80770400  |
| H | 0.47574400  | -5.20982800 | 2.10404300  |
| H | -4.05565600 | -5.47172500 | 4.17954900  |
| H | -6.19892200 | -5.55573200 | 3.02245900  |
| H | -0.12146200 | -5.12879700 | -2.84357600 |
| H | -7.41773800 | -5.59333200 | 0.49260600  |
| H | -6.99090700 | -5.56015300 | -1.90545600 |
| H | -2.56138300 | -5.33949100 | -4.19143600 |
| H | -4.97230500 | -5.47241300 | -3.85966700 |
| H | -6.88247000 | 6.03024500  | 1.18012400  |
| H | -6.71453500 | 6.11006000  | -1.24814900 |
| H | -5.40508300 | 5.71264000  | 3.55668000  |
| H | -3.16979700 | 5.37839200  | 4.46317100  |
| H | -4.91935000 | 5.95900500  | -3.41802700 |
| H | -2.57832300 | 5.65884100  | -4.02230900 |
| H | -0.46369100 | 5.03595400  | 3.77591700  |
| H | 1.07557600  | 4.85560800  | 1.87954200  |
| H | -0.01219400 | 5.20767700  | -2.97367500 |
| H | 13.34471800 | -1.58707400 | -0.32829700 |
| H | 13.43331100 | 0.07221900  | -1.00301300 |
| H | 13.17545300 | 1.02256100  | 1.29541100  |
| H | 12.99525100 | -0.61687500 | 1.96160100  |
| H | 15.32962000 | -1.16325600 | 1.22869700  |
| H | 16.87425300 | 0.72425700  | 0.56168100  |
| H | 15.61486200 | 0.45242600  | -0.66446200 |
| H | 15.47008100 | 1.81816700  | 0.46861600  |
| H | 16.47268900 | 0.20102700  | 2.99930800  |
| H | 14.86889900 | -0.35083000 | 3.55672900  |
| H | 15.09680100 | 1.33230800  | 3.01650100  |
| C | -6.78460800 | -1.11282400 | -0.32291300 |
| C | -6.59489800 | -0.36610900 | -1.55909400 |
| C | -6.49221800 | 1.03496200  | -1.52419400 |

|   |             |             |             |
|---|-------------|-------------|-------------|
| C | -6.76135500 | 1.01926100  | 0.93973500  |
| C | -6.86730200 | -0.43234400 | 0.90385100  |
| C | -5.71246100 | -1.13934900 | -2.42111400 |
| C | -5.50351500 | 1.71334800  | -2.35016000 |
| C | -6.01446800 | 1.38602500  | 2.13458700  |
| C | -6.18580600 | -0.96211800 | 2.07646800  |
| C | -6.02133600 | -2.34814300 | -0.42150500 |
| C | -5.10930400 | 2.46027600  | 2.09355400  |
| C | -4.91688000 | 3.20348400  | 0.85837100  |
| C | -4.76014200 | -0.48396200 | -3.21993700 |
| C | -4.97654900 | 2.83705400  | -1.58886900 |
| C | -4.65371700 | 0.96709700  | -3.18413100 |
| C | -5.65967700 | 0.16150200  | 2.83859500  |
| C | -5.44747700 | -2.15392300 | 1.98011200  |
| C | -5.36144500 | -2.85612900 | 0.70898800  |
| C | -5.35833600 | -2.36518900 | -1.71811600 |
| C | -4.15487500 | -2.26347600 | 2.64132100  |
| C | -4.01869100 | -3.40035600 | 0.58523200  |
| C | -4.06044500 | -2.88582100 | -1.83311800 |
| C | -4.41261300 | 0.05433300  | 3.47777700  |
| C | -3.24291900 | 1.31759800  | -3.28430500 |
| C | -3.27427900 | -3.03280100 | 1.77723100  |
| C | -3.37972700 | -3.41608300 | -0.66238700 |
| C | -3.07270300 | -2.20932000 | -2.66075800 |
| C | -1.78195500 | -2.31835700 | -1.99726800 |
| C | -1.44335800 | 2.28896400  | -1.88490300 |
| C | -1.97571500 | -3.05892700 | -0.76189800 |
| C | -1.25446700 | -2.70776300 | 0.38649600  |
| C | -0.31161100 | -1.60190400 | 0.34624800  |
| C | -1.91652000 | -2.69386300 | 1.67964500  |
| C | -3.47543200 | 1.16851100  | 3.43771800  |
| C | -0.70167500 | 1.10004400  | -1.98263600 |
| C | -3.64748600 | -1.18086800 | 3.37939500  |
| C | -2.23748500 | -0.82993900 | 3.27788600  |
| C | -1.22979200 | -0.02360500 | -2.74308200 |
| C | -1.53152000 | 2.98889400  | -0.61388200 |
| C | -0.87225600 | 2.48062500  | 0.51374300  |
| C | -0.87446800 | -1.24750200 | -2.03879300 |
| C | -0.12855800 | -0.88045100 | -0.84375500 |
| C | -1.38711600 | -1.57533600 | 2.44371700  |
| C | -0.39744700 | -0.89813500 | 1.61648500  |
| C | -0.01819500 | 0.56904200  | -0.80999500 |
| C | -2.13151200 | 0.62177700  | 3.31369200  |
| C | -1.53623400 | 2.49687500  | 1.80694600  |

|    |             |             |             |
|----|-------------|-------------|-------------|
| C  | -0.10709300 | 1.24898500  | 0.41529500  |
| C  | -1.17983600 | 1.27583000  | 2.51291200  |
| C  | -0.29958700 | 0.50246300  | 1.64865400  |
| C  | -2.73481900 | 2.40084900  | -2.54745600 |
| C  | -3.61686700 | 3.17146000  | -1.68354000 |
| C  | -2.87085900 | 3.54108800  | -0.49119100 |
| C  | -3.41478500 | -1.02977600 | -3.34258000 |
| C  | -2.47747600 | 0.08341800  | -3.38414100 |
| C  | -6.57586900 | 1.73982000  | -0.25240700 |
| C  | -5.63870900 | 2.85238900  | -0.29300000 |
| C  | -3.51014700 | 3.55375100  | 0.75687100  |
| C  | -3.81684800 | 2.34765500  | 2.75465000  |
| C  | -2.83094300 | 3.02221100  | 1.92620200  |
| Li | -3.20043500 | -0.01428000 | -0.07942000 |

**Li<sup>+</sup>C<sub>70</sub>@1**: energy = -5535.3799072 au

|   |             |             |             |
|---|-------------|-------------|-------------|
| C | -3.96339700 | 3.08087900  | 0.81412600  |
| C | -3.98041600 | 2.05811200  | -0.18890600 |
| C | -5.02358900 | 1.12889800  | -0.22015800 |
| C | -6.06882400 | 1.16974600  | 0.72891400  |
| C | -6.07828000 | 2.19691600  | 1.70792400  |
| C | -5.02790200 | 3.11810500  | 1.74478200  |
| C | -7.22284400 | 0.24104600  | 0.64060400  |
| C | -8.49109800 | 0.76510600  | 1.04503300  |
| C | -8.55880800 | 2.09060800  | 1.77857400  |
| C | -7.28144500 | 2.29858200  | 2.62045500  |
| C | -7.13357700 | -1.07856000 | 0.09396700  |
| C | -8.31739100 | -1.77152400 | -0.31060700 |
| C | -9.54229100 | -1.19485600 | 0.01807700  |
| C | -9.62545200 | 0.02262700  | 0.72317700  |
| C | -5.86743300 | -1.84688600 | 0.01312900  |
| C | -5.73243000 | -2.86064400 | -0.96999000 |
| C | -6.90704600 | -3.12009100 | -1.88835500 |
| C | -8.20250300 | -3.09203000 | -1.04793100 |
| C | -4.85108100 | -1.67644000 | 0.97739500  |
| C | -3.69350300 | -2.46125300 | 0.95931500  |
| C | -3.52845500 | -3.46108700 | -0.05262800 |
| C | -4.56782100 | -3.63187200 | -0.99787400 |
| O | -2.95020500 | 2.07874800  | -1.08480500 |
| C | -2.85989900 | 0.99573500  | -2.02110500 |
| O | -2.68538100 | -2.35414700 | 1.86960200  |
| C | -2.80201400 | -1.33087800 | 2.86684400  |
| C | -2.37852700 | -4.28957000 | -0.08043300 |
| C | -2.93297600 | 4.05283700  | 0.81595900  |

|   |              |             |             |
|---|--------------|-------------|-------------|
| C | -10.93049700 | -1.69378900 | -0.21872400 |
| N | -11.77927400 | -0.75664500 | 0.40297300  |
| C | -11.06858000 | 0.31702800  | 0.97741900  |
| O | -11.59087600 | 1.26460700  | 1.55568500  |
| O | -11.31929100 | -2.69466400 | -0.81284800 |
| C | -2.02794400  | 4.88168600  | 0.76148100  |
| C | -1.39150800  | -5.02023100 | -0.08198700 |
| C | 1.36310300   | -5.14200900 | -3.56383400 |
| C | 0.33761900   | -5.24259400 | -2.61907200 |
| C | 2.65912500   | -5.75527800 | -3.35138000 |
| C | 0.50603400   | -5.97634900 | -1.38184000 |
| C | 1.67541400   | -6.72645000 | -1.29648800 |
| C | 2.72174200   | -6.61305800 | -2.25193300 |
| C | 2.25277900   | -7.12889000 | -0.06186700 |
| C | 3.94221800   | -6.94519300 | -1.60708000 |
| C | 3.94869300   | -5.41037500 | -3.92099400 |
| C | 3.65230300   | -7.26269100 | -0.25363500 |
| C | 5.14920600   | -5.73809600 | -3.28554200 |
| C | -0.20158600  | -5.79304600 | -0.10973700 |
| C | 5.17813800   | -6.44505600 | -2.01833500 |
| C | 0.38260300   | -6.20873600 | 1.11229900  |
| C | 1.69022200   | -6.81081100 | 1.17551400  |
| C | 6.21093000   | -6.47991800 | -1.00020600 |
| C | 5.92626100   | -6.79328400 | 0.33244300  |
| C | 2.61955800   | -6.85823800 | 2.29122700  |
| C | 4.58049600   | -7.10210700 | 0.77702000  |
| C | 3.99695400   | -6.99901300 | 2.10114300  |
| C | 4.98593500   | 6.91326500  | -1.92140400 |
| C | 4.99410600   | 7.26315900  | -0.56833200 |
| C | 3.75055400   | 6.75612000  | -2.66701000 |
| C | 3.76760000   | 7.48985400  | 0.17371000  |
| C | 2.61470200   | 7.52952900  | -0.61187400 |
| C | 2.60630100   | 7.17708700  | -1.98831200 |
| C | 1.31665000   | 7.29028400  | -0.08936400 |
| C | 1.30227800   | 6.72040300  | -2.31867200 |
| C | 3.48854000   | 5.98693000  | -3.86973500 |
| C | 0.50609000   | 6.78458100  | -1.14194500 |
| C | 2.20592100   | 5.53960200  | -4.19617100 |
| C | 3.52007000   | 7.40570500  | 1.60183700  |
| C | 1.05879500   | 5.81335100  | -3.35025000 |
| C | 2.24374200   | 7.16923200  | 2.11716600  |
| C | 1.08657300   | 6.99130500  | 1.25514000  |
| C | -0.18702100  | 5.07932400  | -3.22733000 |
| C | -0.96201800  | 5.12738700  | -2.06640300 |

|   |              |             |             |
|---|--------------|-------------|-------------|
| C | -0.14550800  | 6.28829200  | 1.52187700  |
| C | -0.57040100  | 5.93076000  | -0.92642100 |
| C | -0.94790900  | 5.75890100  | 0.48424000  |
| C | -13.23701700 | -0.83728500 | 0.36467400  |
| C | -13.80777800 | -0.22739100 | -0.92687200 |
| C | -15.34106400 | -0.35546800 | -1.03520400 |
| C | -16.06543000 | 0.40957700  | 0.08935800  |
| C | -15.81288100 | 0.14233300  | -2.41364600 |
| H | -5.04498600  | 0.36627400  | -0.99136600 |
| H | -5.03518600  | 3.91334300  | 2.49071400  |
| H | -9.46564000  | 2.12316700  | 2.39320300  |
| H | -8.64112900  | 2.90996100  | 1.04275900  |
| H | -7.24269700  | 1.52215100  | 3.40494900  |
| H | -7.30252800  | 3.27560100  | 3.12331500  |
| H | -6.97382200  | -2.34183000 | -2.66907400 |
| H | -6.79382700  | -4.08858100 | -2.39533100 |
| H | -8.17307900  | -3.91781700 | -0.31538100 |
| H | -9.09614300  | -3.24508500 | -1.66388200 |
| H | -4.98634700  | -0.92526200 | 1.74842000  |
| H | -4.45897200  | -4.41626800 | -1.74757500 |
| H | -1.92325500  | 1.15932400  | -2.56401500 |
| H | -2.82410100  | 0.02737400  | -1.49672000 |
| H | -3.71356800  | 1.00500000  | -2.71935100 |
| H | -1.88710000  | -1.39845100 | 3.46316600  |
| H | -2.86904700  | -0.33366200 | 2.40180500  |
| H | -3.68686400  | -1.49992600 | 3.50318700  |
| H | 1.21421000   | -4.48631600 | -4.42347800 |
| H | -0.57504900  | -4.66419700 | -2.76595000 |
| H | 3.98797500   | -4.78265800 | -4.81297700 |
| H | 6.08067300   | -5.35493800 | -3.70611800 |
| H | -0.13649900  | -5.93925100 | 2.03243800  |
| H | 7.22062400   | -6.15008800 | -1.25114500 |
| H | 6.72469000   | -6.69682100 | 1.07034400  |
| H | 2.25036800   | -6.67198800 | 3.30117400  |
| H | 4.65152000   | -6.91759800 | 2.97076500  |
| H | 5.93365300   | 6.65081400  | -2.39531000 |
| H | 5.94759300   | 7.25975000  | -0.03707000 |
| H | 4.32668000   | 5.65539600  | -4.48537400 |
| H | 2.09091700   | 4.87400900  | -5.05366700 |
| H | 4.36451000   | 7.41942400  | 2.29345000  |
| H | 2.13863300   | 7.00570700  | 3.19107400  |
| H | -0.47221300  | 4.37628700  | -4.01216000 |
| H | -1.81722600  | 4.45838200  | -1.96848800 |
| H | -0.41102100  | 6.02879000  | 2.54729600  |



|   |              |             |             |
|---|--------------|-------------|-------------|
| H | -13.50777200 | -1.89992700 | 0.43495300  |
| H | -13.60530800 | -0.30515300 | 1.25006600  |
| H | -13.52339400 | 0.83705800  | -0.97278700 |
| H | -13.33685600 | -0.73568500 | -1.78252100 |
| H | -15.59729000 | -1.42686500 | -0.94864300 |
| H | -17.15685300 | 0.33175100  | -0.02858800 |
| H | -15.80582900 | 0.02289500  | 1.08559300  |
| H | -15.79454300 | 1.47736900  | 0.05845000  |
| H | -16.90180400 | 0.02545900  | -2.52396200 |
| H | -15.32040600 | -0.41257800 | -3.22673400 |
| H | -15.57251800 | 1.21098600  | -2.53570400 |
| C | 6.94391300   | -0.18396600 | 1.57553100  |
| C | 6.94189800   | 0.86121800  | 0.60262400  |
| C | 6.75093200   | 0.50349200  | -0.81471600 |
| C | 6.57584500   | -0.87289000 | -1.15319400 |
| C | 6.66985000   | -1.91881200 | -0.15329100 |
| C | 6.85342600   | -1.57929200 | 1.19216400  |
| C | 5.59665700   | -1.28271000 | -2.12957700 |
| C | 5.08840300   | -2.58115200 | -1.73362600 |
| C | 3.73577100   | -2.88273200 | -1.92057500 |
| C | 2.85355300   | -1.89953400 | -2.51476200 |
| C | 3.34513700   | -0.64771200 | -2.99542400 |
| C | 1.57599700   | -1.99490100 | -1.85221600 |
| C | 0.75481000   | -0.84445700 | -1.65575300 |
| C | 0.06464000   | -0.68416200 | -0.36166800 |
| C | 0.25363400   | -1.68561400 | 0.63617000  |
| C | 1.02097300   | -2.88315100 | 0.37293600  |
| C | 1.67287200   | -3.03684300 | -0.85203800 |
| C | 0.44334300   | -1.33546500 | 2.02005800  |
| C | 1.32184000   | -2.32189900 | 2.61453400  |
| C | 2.26763900   | -1.92662200 | 3.56700700  |
| C | 2.36164300   | -0.53096400 | 3.94844700  |
| C | 1.44692700   | 0.44495500  | 3.44736800  |
| C | 0.44942200   | 0.02644700  | 2.44619700  |
| C | 4.27068900   | 1.07895900  | 3.84161000  |
| C | 5.57669800   | 1.17754000  | 3.16516400  |
| C | 6.27066600   | -0.02756200 | 2.84122900  |
| C | 5.76447900   | -1.32658800 | 3.24070200  |
| C | 4.52336000   | -1.41995000 | 3.88169100  |
| C | 3.75559600   | -0.21799200 | 4.14346100  |
| C | 4.77036400   | -0.32695200 | -2.79531900 |
| C | 5.14945500   | 1.04315700  | -2.65756000 |
| C | 2.40448800   | 0.42527600  | -3.04366500 |
| C | 4.18428300   | 2.11584400  | -2.79920900 |

|    |             |             |             |
|----|-------------|-------------|-------------|
| C  | 2.83053500  | 1.80977200  | -2.98756600 |
| C  | 1.12570500  | 0.32768600  | -2.38182600 |
| C  | 0.76235600  | 1.65279100  | -1.91795000 |
| C  | 0.11405600  | 1.80252200  | -0.68682500 |
| C  | -0.20114200 | 0.63590400  | 0.11151900  |
| C  | -0.01740500 | 0.98734100  | 1.49879500  |
| C  | 0.41030200  | 2.37135300  | 1.55388800  |
| C  | 1.35829100  | 2.77033500  | 2.50328600  |
| C  | 1.91108600  | 1.79470500  | 3.42249500  |
| C  | 3.30597100  | 2.10768300  | 3.61746800  |
| C  | 3.61583700  | 3.27662900  | 2.81836600  |
| C  | 4.85734300  | 3.37229700  | 2.17718700  |
| C  | 5.82174400  | 2.29824100  | 2.31489800  |
| C  | 6.49611800  | 2.14222900  | 1.04958200  |
| C  | 5.94843200  | 3.11989400  | 0.12930800  |
| C  | 5.76585300  | 2.77915100  | -1.21658900 |
| C  | 6.12764600  | 1.45336900  | -1.67951500 |
| C  | 1.81181500  | 2.57796600  | -2.30010400 |
| C  | 0.48325100  | 2.88342500  | 0.20071900  |
| C  | 2.40988100  | 3.69870400  | 2.13263300  |
| C  | 4.93837400  | 3.89495600  | 0.82634700  |
| C  | 4.56686700  | 3.20111400  | -1.91603000 |
| C  | 5.75938100  | -2.98921100 | -0.51538700 |
| C  | 3.00480400  | -3.60562500 | -0.89984400 |
| C  | 1.67451500  | -3.29492100 | 1.59829500  |
| C  | 3.60528600  | -2.48952400 | 3.53542700  |
| C  | 6.13302200  | -2.29817200 | 2.22696800  |
| C  | 3.64705100  | -3.99823100 | 0.28459500  |
| C  | 2.96918800  | -3.83527900 | 1.55919900  |
| C  | 3.95336000  | -3.42561900 | 2.54598000  |
| C  | 5.24255600  | -3.33052900 | 1.87957900  |
| C  | 5.05063700  | -3.68031900 | 0.48193600  |
| C  | 3.76974300  | 4.29239400  | 0.15575600  |
| C  | 2.48422900  | 4.19025300  | 0.82018900  |
| C  | 1.50236000  | 3.77508600  | -0.16325000 |
| C  | 2.18061700  | 3.61959000  | -1.43524500 |
| C  | 3.58143500  | 3.93908300  | -1.23976100 |
| Li | 3.38308700  | 0.47989900  | 0.00000000  |
